# Supplementary material
Source: PubMed Central journal article supplement (PMC4995138)

## Supplementary Information

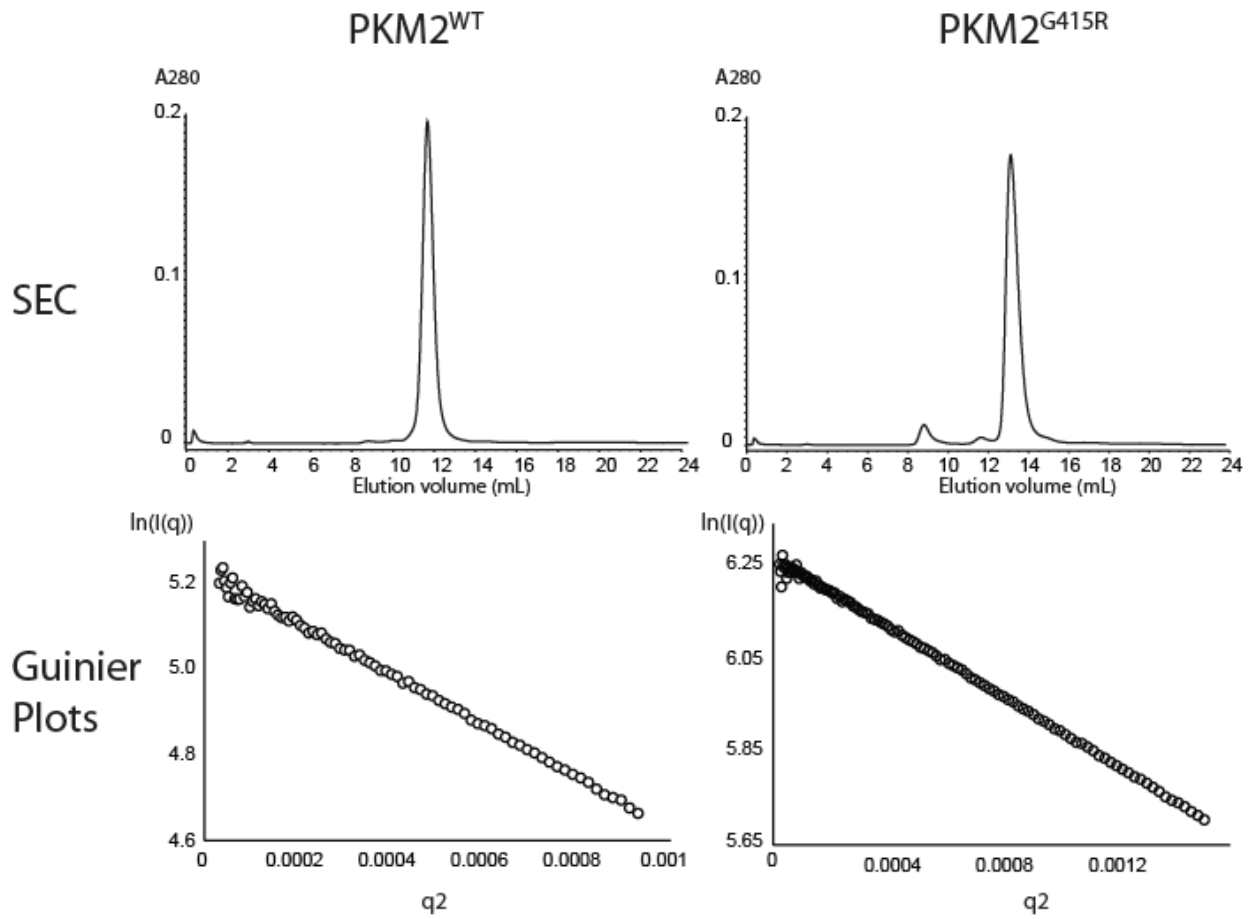

**Figure S1.** Guinier plots of SAXS data..

Supplement: NIHMS808591-supplement-Supplement.pdf [file NIHMS808591-supplement-Supplement.pdf]
